# Supplementary material
Source: Springer Nature journal article supplement (https://www.springermedizin.de/resource/supplementary/13018_2007_66_MOESM4_ESM.pdf/9636250)

**A**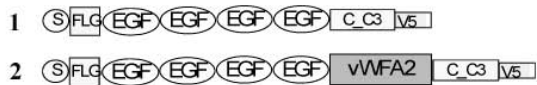**B**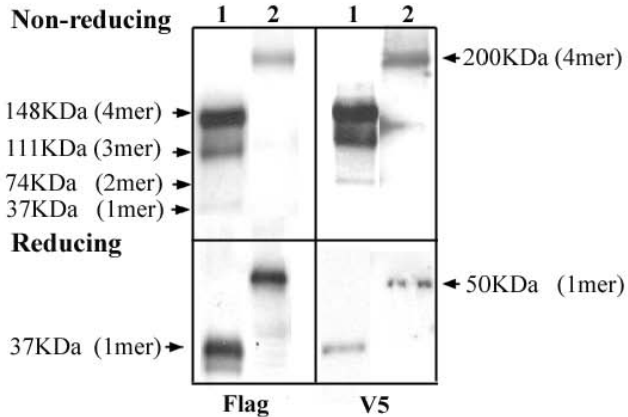

Supplement: MOESM4 [file 9636250]
